# Supplementary material for: Transformation of nanoparticles via the transition of functional DNAs responsive to pH and vascular endothelial growth factor for photothermal anti-tumor therapy
Source: Royal Society of Chemistry journal article supplement (doi:10.1039/d3bm01968c), 2024-01-01
Supplement: d3bm01968c1.pdf [file d3bm01968c1.pdf]

## Supplementary Information

### Transformation of nanoparticles via transition of functional DNAs responsive to pH and vascular endothelial growth factor for photothermal anti-tumor therapy

*Jinseong Kim<sup>a</sup>, Yunyoung Nah<sup>a</sup>, Seongmin Kim<sup>a</sup>, Won Jong Kim<sup>a, b, c\*</sup>*

*<sup>a</sup> Department of Chemistry, POSTECH-CATHOLIC Biomedical Engineering Institute,  
Pohang University of Science and Technology (POSTECH), Pohang 37673, Republic of  
Korea*

*<sup>b</sup> School of Interdisciplinary Bioscience and Bioengineering, Pohang University of Science  
and Technology (POSTECH), Pohang 37673, Republic of Korea*

*<sup>c</sup> OmniaMed Co., Ltd., Pohang, Republic of Korea*

\*e-mail: [wjkim@postech.ac.kr](mailto:wjkim@postech.ac.kr)

**Table S1.** DNA sequence used in the experiment. Blue letters indicate the complementary sequence and red letters indicate the split VEGF aptamer fragment.

| Sequence name         | Sequence                                               |
|-----------------------|--------------------------------------------------------|
| Aptamer fragment A    | 5'-Thiol-TTTTTTTTTTTGACTGACTATGTCCCGTCTTC-3'           |
| Aptamer fragment B    | 5'-CAGACAAGAGTGCAGGGGGACATAGTCAGTCATTTTTTTTTT-Thiol-3' |
| Control fragment A    | 5'-Thiol-TTTTTTTTTTTGACTGACTATGTCCCTGACTTGG-3'         |
| Control fragment B    | 5'-TGCATACGATGGCAGGGGGACATAGTCAGTCATTTTTTTTTT-Thiol-3' |
| i-motif               | 5'-Thiol-TTTTCCCCTTCCCCTTCCCCTTCCCC-3'                 |
| i-motif control       | 5'-Thiol-TTTTCCAATTGGACTTCCCCTTCAAA-3'                 |
| i-motif complimentary | 5'-TTTGAAGGGGAAGTCCAATTGG-3'                           |

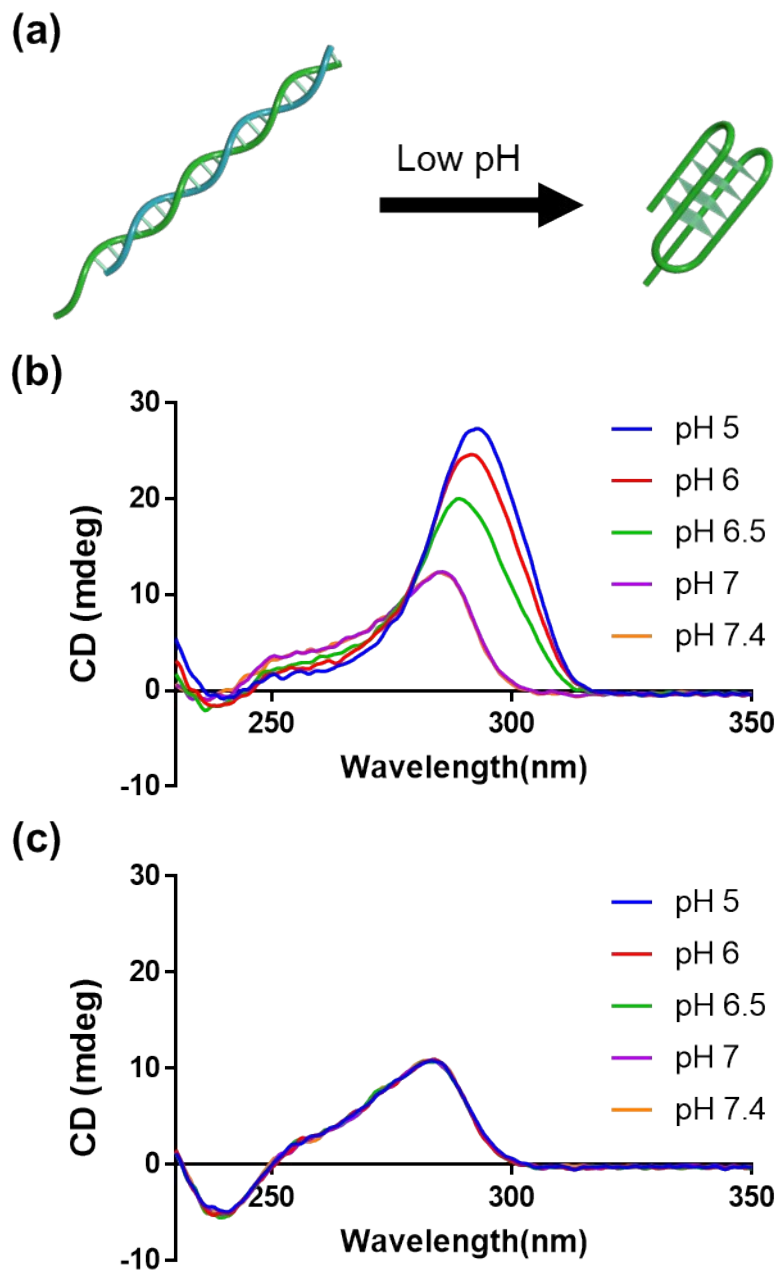

**Figure S1.** Circular dichroism spectra of i-motif duplex at different pH. (a) Schematic illustration of i-motif duplex transition in response to low pH. (b) i-motif duplex consisting of i-motif and i-motif complementary sequence. (c) i-ctrl duplex consisting of pH-insensitive i-motif control and i-motif complementary sequence.

**Table S2.** DNAs used in Au-DNAs. Aptamer indicates VEGF aptamer fragment. Aptamer fragment that cannot capture VEGF was used as a Control. i-motif duplex is DNA duplex consisting of i-motif and i-motif complementary sequence. I-ctrl duplex indicates DNA duplex consisting of pH-insensitive i-motif control and i-motif complementary sequence.

|                  | Au-A-IC         | Au-B-IC | Au-CA-I | Au-CB-I | Au-A-I  | Au-B-I |
|------------------|-----------------|---------|---------|---------|---------|--------|
| Aptamer fragment | Aptamer         |         | Control |         | Aptamer |        |
| DNA duplex       | i-motif control |         | i-motif |         | i-motif |        |

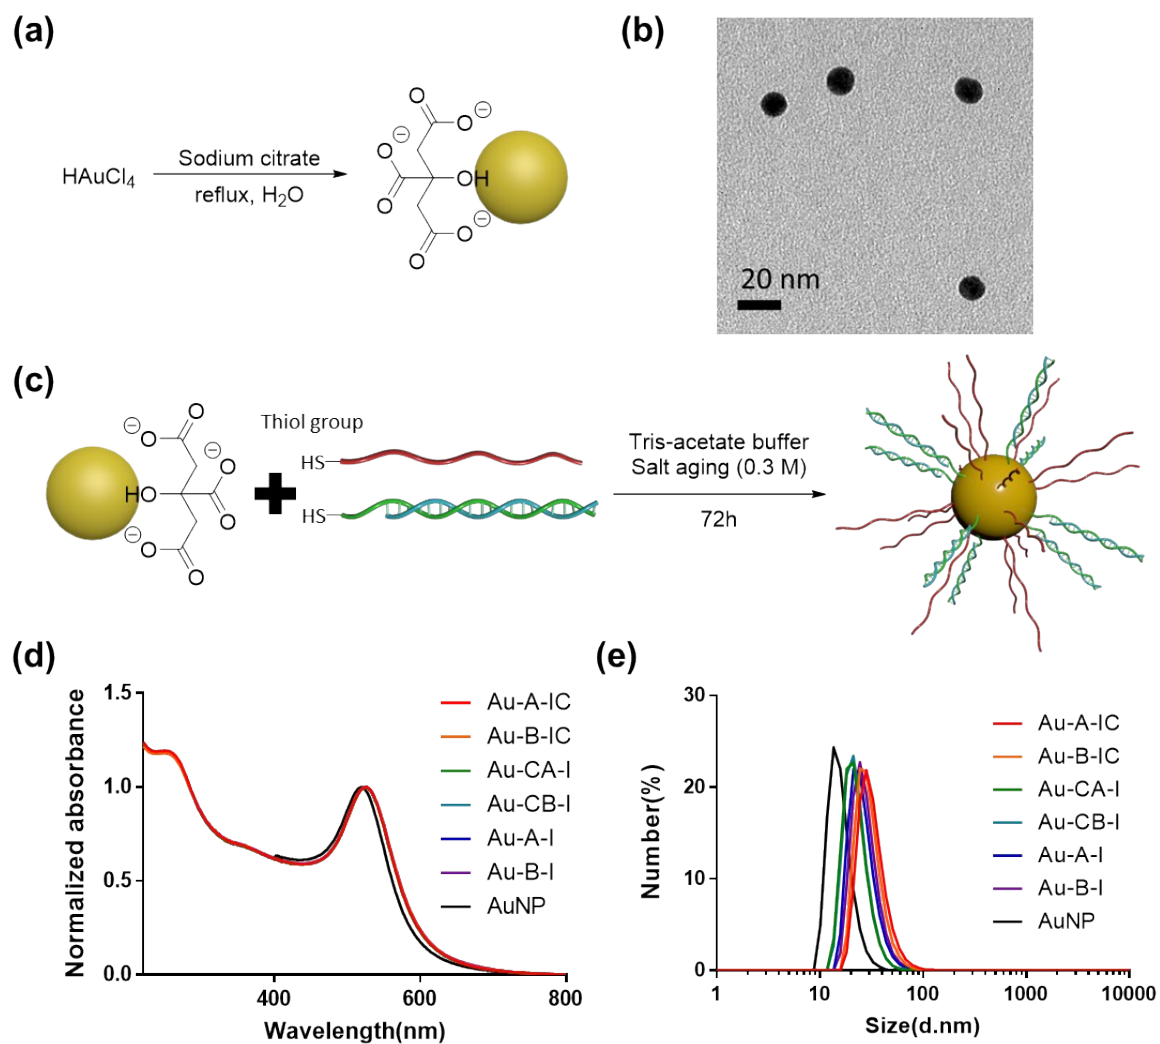

**Figure S2.** Characterization of AuNP and Au-DNAs. (a) Synthetic method for AuNP. (b) TEM image of AuNP. (c) Synthetic method for Au-DNAs. (d) Absorption spectra of AuNP and Au-DNAs. (e) Hydrodynamic size of AuNP and Au-DNAs.

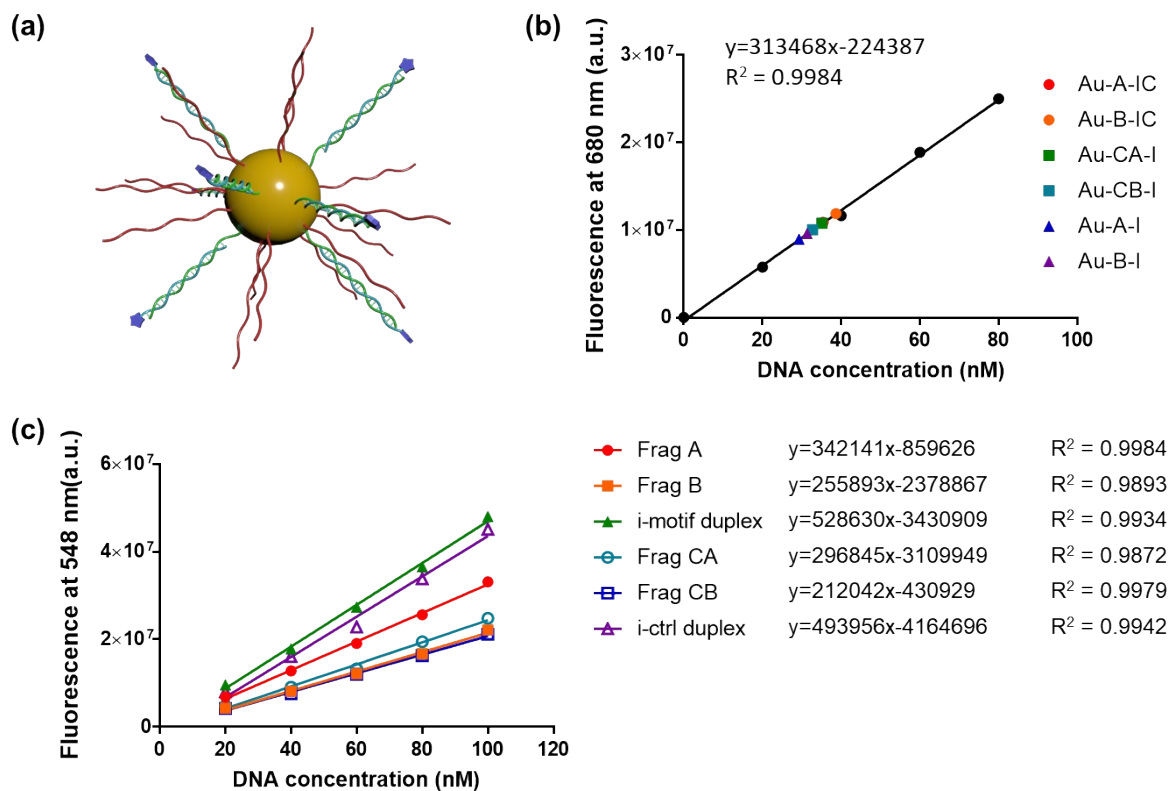

**Figure S3.** DNA quantification of Au-DNAs. (a) Schematic illustration of Au-DNAs with Cy5-modified i-motif complementary sequence. (b) DNA quantification of i-motif complementary by fluorescence of Cy5. (c) DNA quantification of various sequences by fluorescence of SYBR gold.

**Table S3.** The amount of DNAs conjugated to each Au-DNAs from figure S3.

|         | Aptamer fragment | I-motif duplex |
|---------|------------------|----------------|
| Au-A-I  | 61.8±3.0         | 29.3±1.2       |
| Au-B-I  | 55.1±4.0         | 31.4±2.9       |
| Au-CA-I | 62.2±1.6         | 35.2±0.6       |
| Au-CB-I | 56.5±3.0         | 32.7±1.4       |
| Au-A-IC | 64.4±2.7         | 35.4±2.9       |
| Au-B-IC | 55.3±1.6         | 38.7±1.7       |

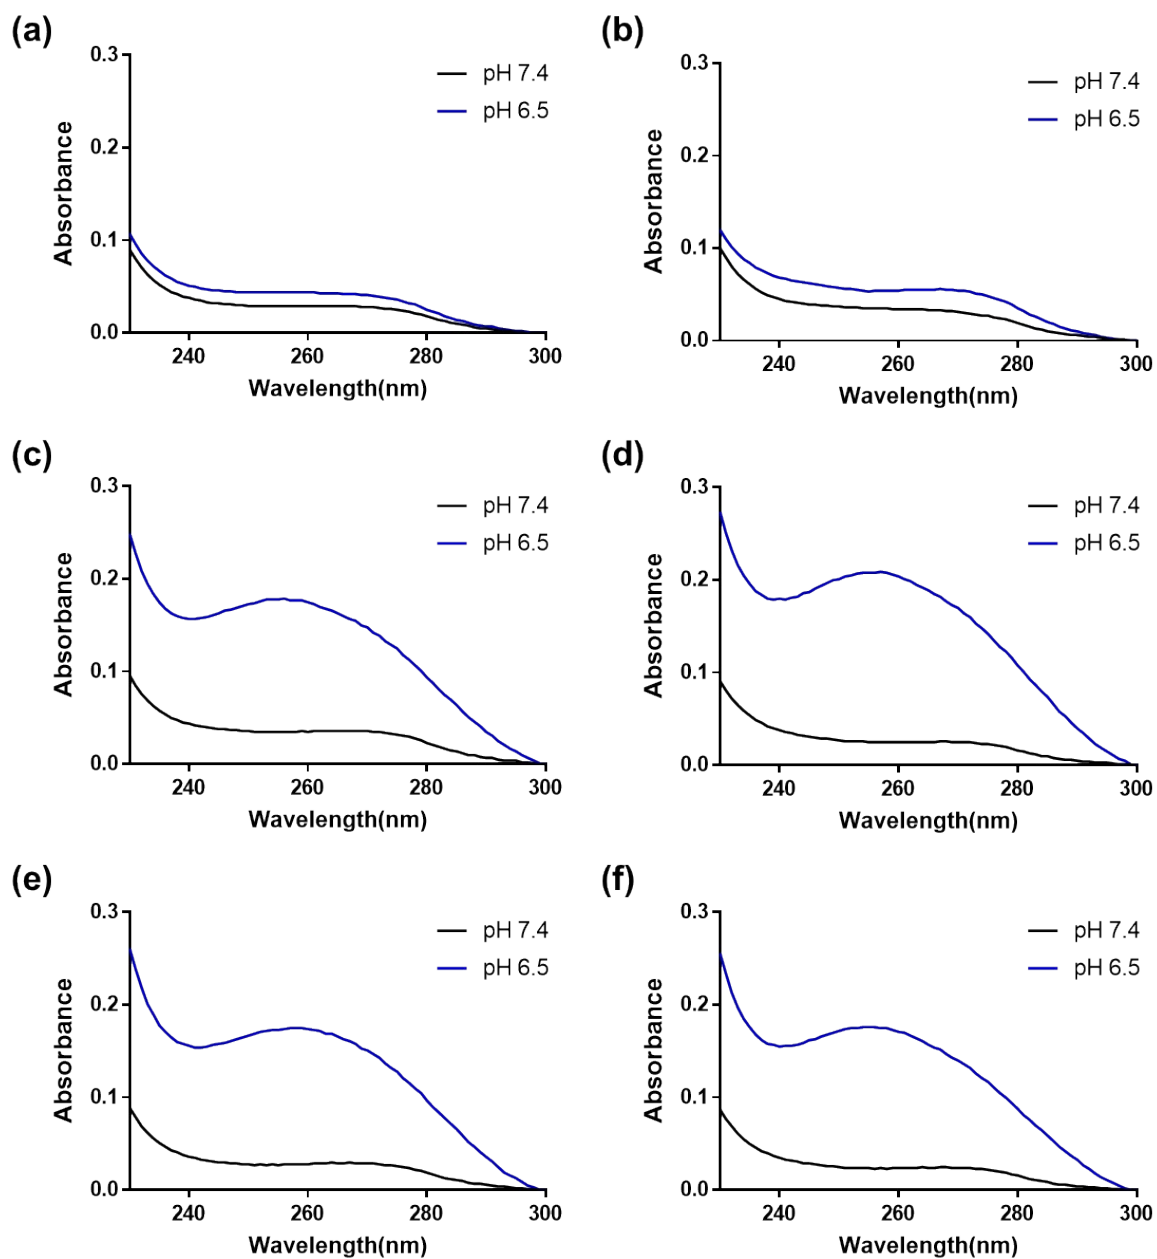

**Figure S4.** Absorbance spectra of DNA from Au-DNAs at different pH. (a) Au-A-IC, (b) Au-B-IC, (c) Au-CA-I, (d) Au-CB-I, (e) Au-A-I and (f) Au-B-I.

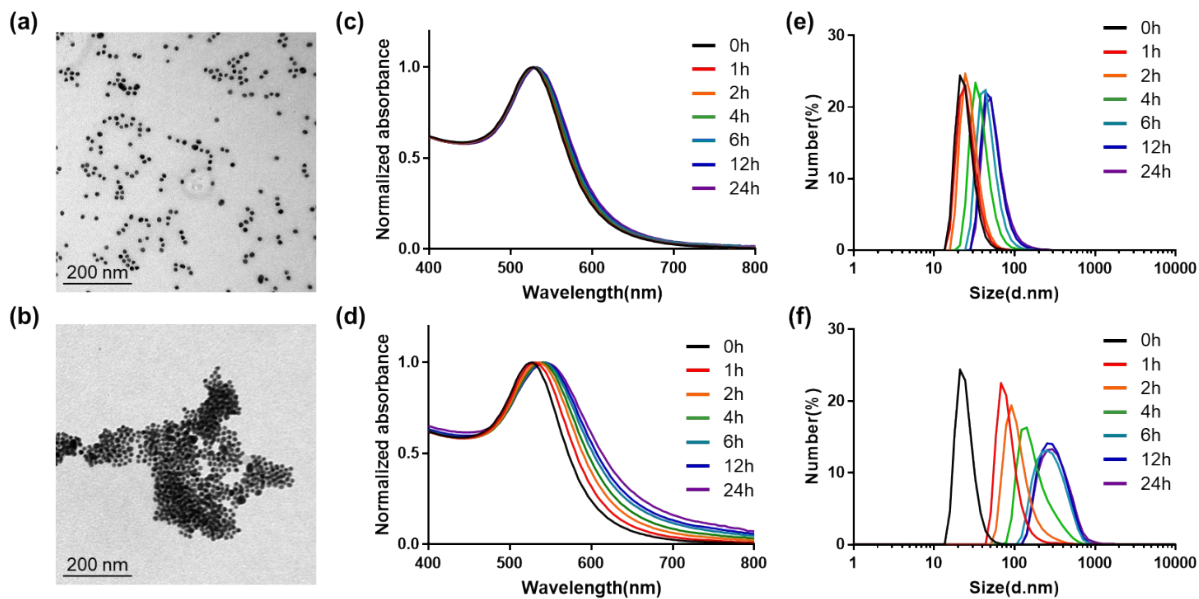

**Figure S5.** pH-responsive behavior of Au-CA-I + Au-CB-I. (a-b) TEM image of Au-CA-I + Au-CB-I after 24 h incubation, (a) at pH 7.4, (b) at pH 6.5. (c-d) Absorbance spectra of Au-CA-I + Au-CB-I for different time interval, (c) at pH 7.4, (d) at pH 6.5. (e-f) hydrodynamic size of Au-CA-I + Au-CB-I for different time interval, (e) at pH 7.4, (f) at pH 6.5.



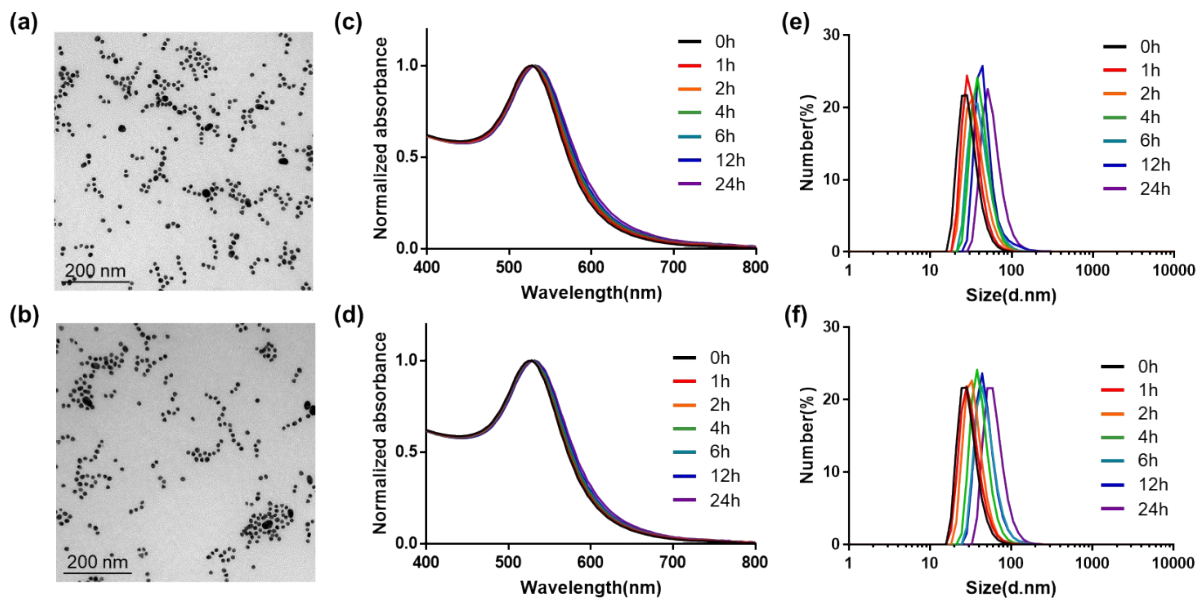

**Figure S6.** pH-responsive behavior of pH-non-responsive Au-A-IC + Au-B-IC. (a-b) TEM image of Au-A-IC + Au-B-IC after 24 h incubation, (a) at pH 7.4, (b) at pH 6.5. (c-d) Absorbance spectra of Au-CA-I + Au-CB-I for different time interval, (c) at pH 7.4, (d) at pH 6.5. (e-f) hydrodynamic size of Au-A-IC + Au-B-IC for different time interval, (e) at pH 7.4, (f) at pH 6.5.

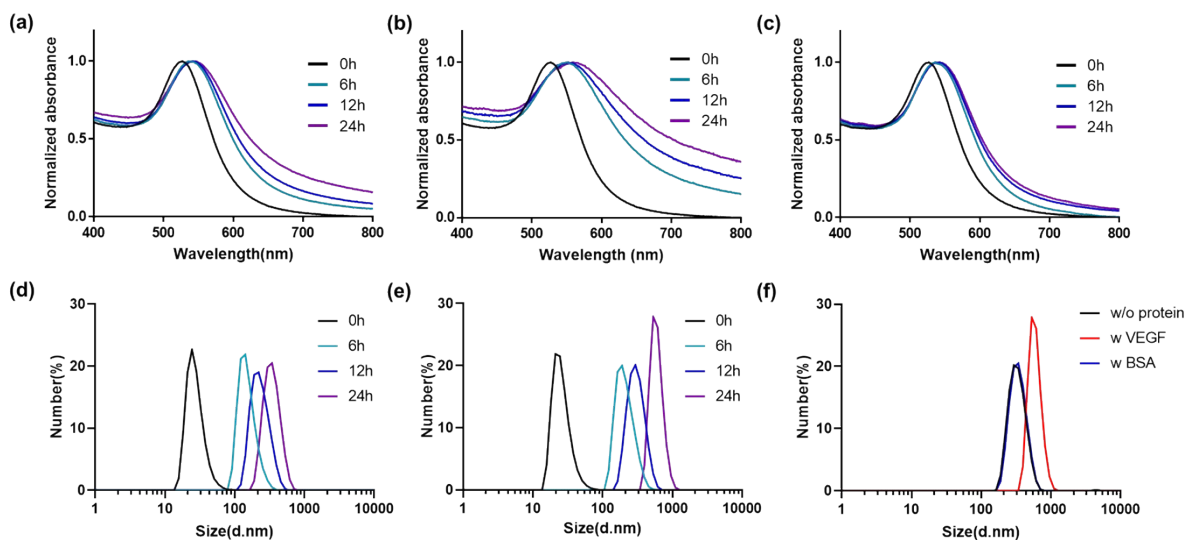

**Figure S7.** Protein-responsive aggregation of Au-DNAs at pH 6.5. (a-c) Absorbance spectra of (a) Au-A-I + Au-B-I w BSA, (b) Au-A-I + Au-B-I w VEGF and (c) Au-CA-I + Au-CB-I w VEGF for different time interval. (d-e) hydrodynamic size of (d) Au-A-I + Au-B-I w BSA and (e) Au-A-I + Au-B-I w VEGF. (f) Hydrodynamic size of Au-A-I + Au-B-I with or without protein after 24 h incubation.

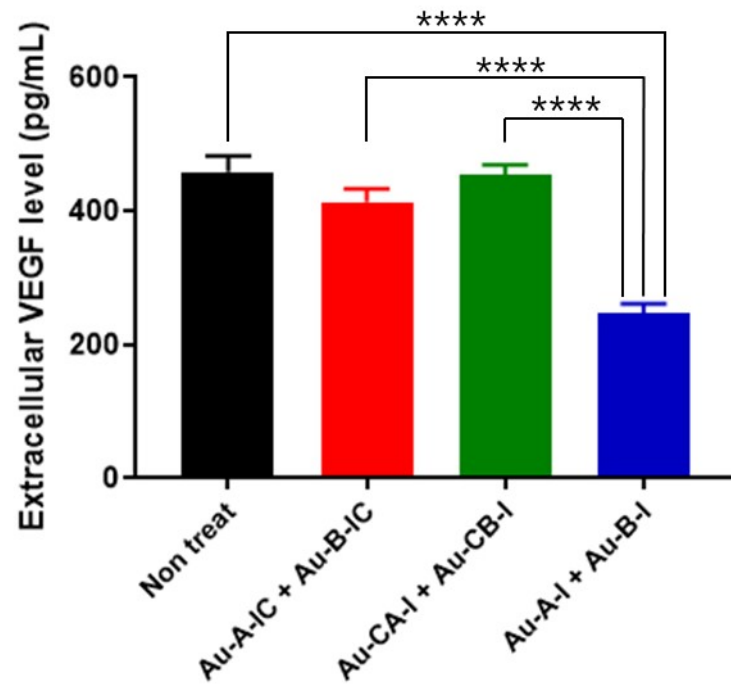

**Figure S8.** *In vitro* extracellular VEGF level. Data represent the mean  $\pm$  SD (n=5, \*\*\*\* $p$  < 0.0001).

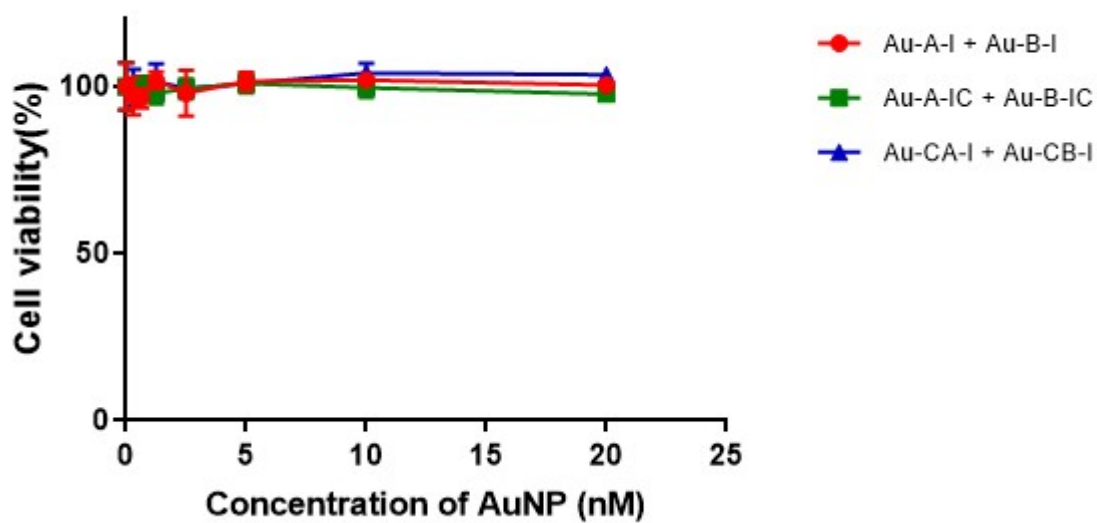

Figure S9. Cell viability of MCF-7 treated with various concentration of Au-DNAs (n=5).

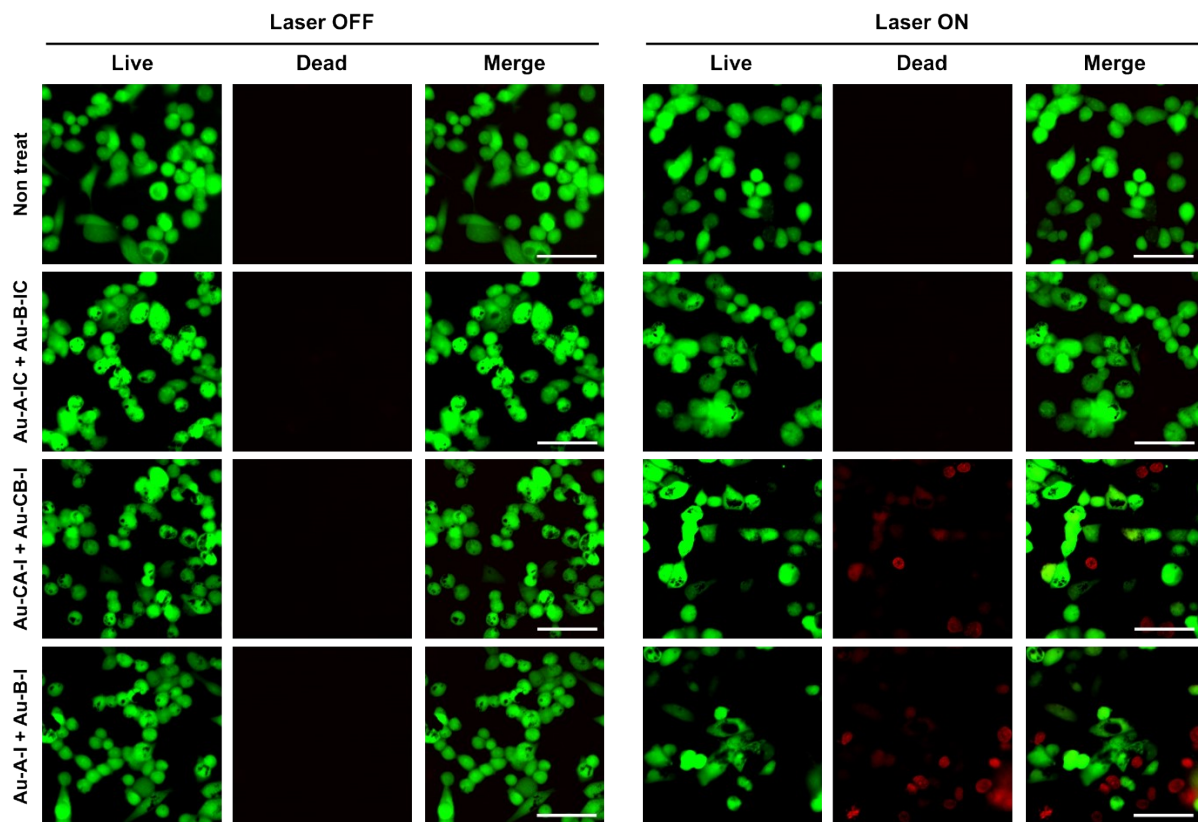

**Figure S10.** Fluorescent image of MCF-7 cells treated with Au-DNAs, with and without 808 nm laser irradiation ( $3 \text{ W cm}^{-2}$ ) (Scale bar =  $50 \mu\text{m}$ ).

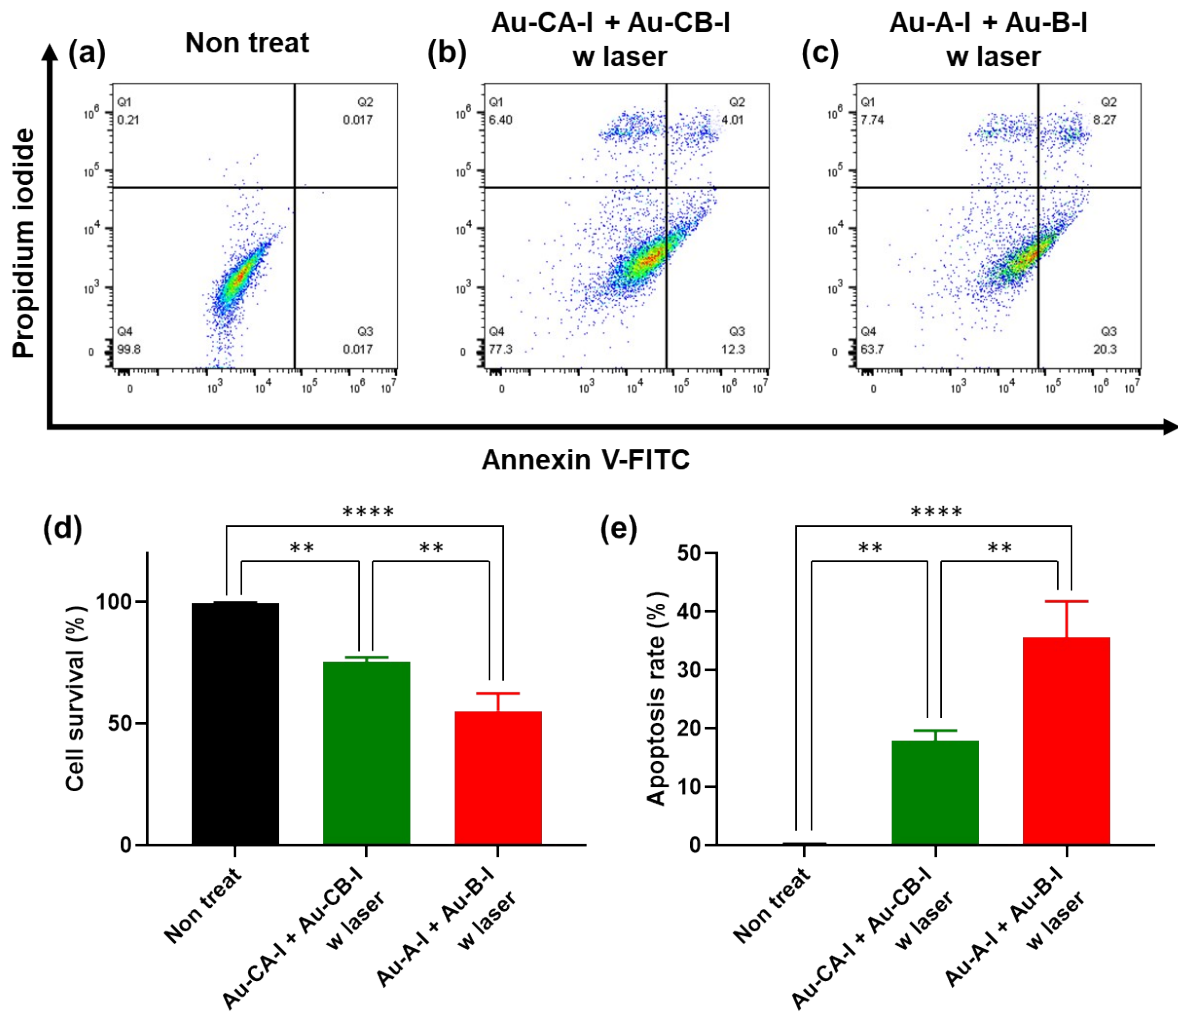

**Figure S11.** Apoptosis of MCF-7 cells induced by Au-DNAs mediated PTT. (a-c) Representative plots of annexin V-FITC/PI-stained cells treated with (a) non treat, (b) Au-CA-I + Au-CB-I with laser irradiation and (c) Au-A-I + Au-B-I with laser irradiation. (d) Rate of survival cells. (e) Rate of apoptosis cells. Data represent the mean  $\pm$  SD ( $n=3$ , \*\* $p < 0.01$ , \*\*\*\* $p < 0.0001$ ).

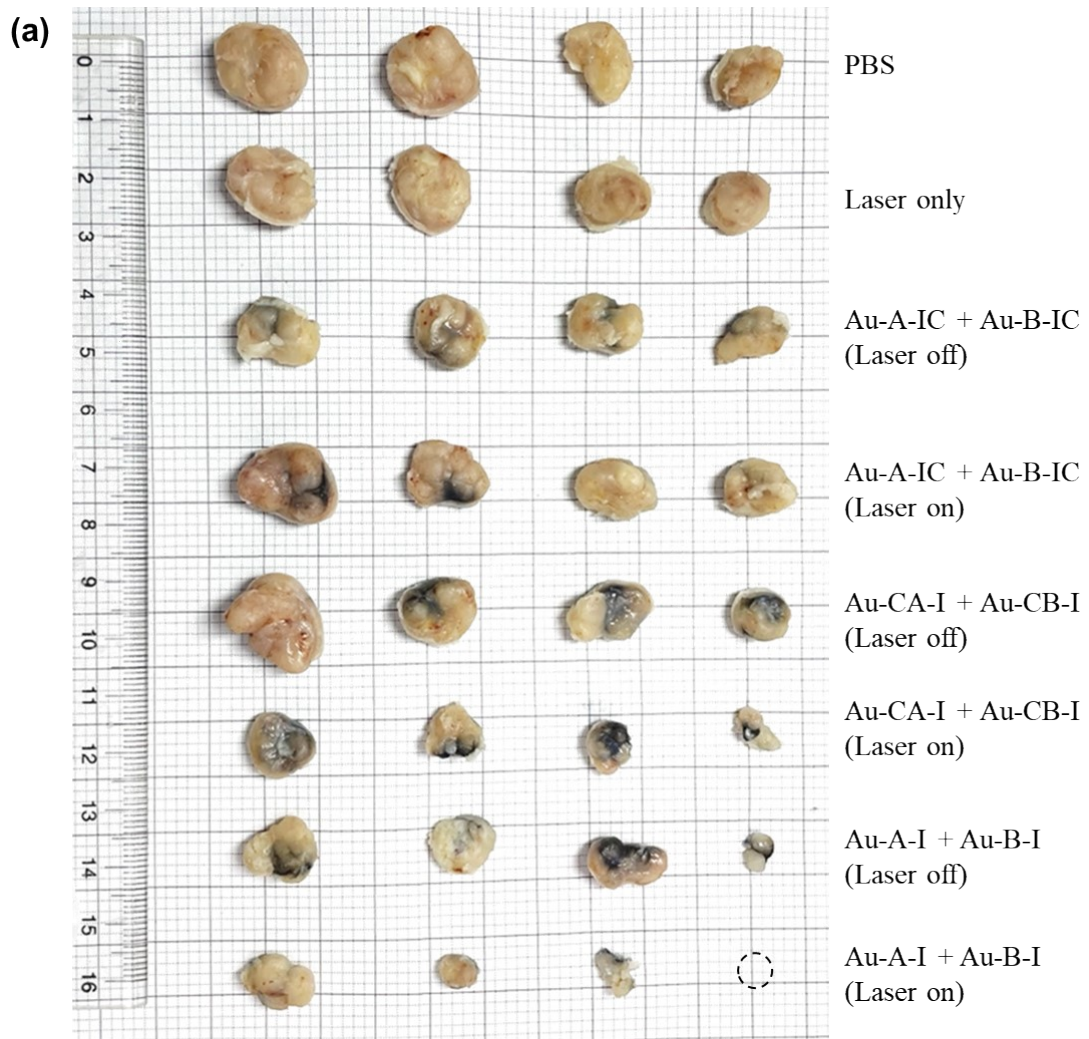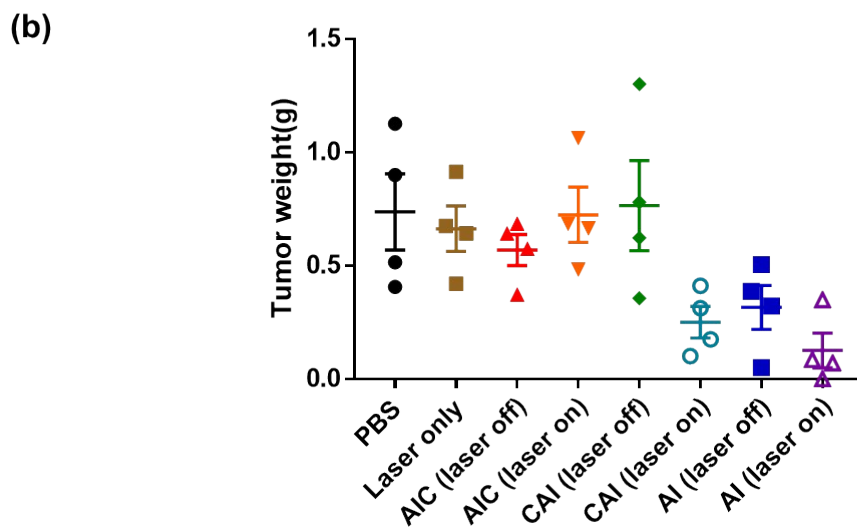

**Figure S12.** Surgically removed tumor tissues from mice on day 22. (a) Image of tumor. (b) Tumor weight.
